# 1 **Emergent vulnerability to intensive coastal anthropogenic disturbances in** 2 **mangrove forests**

3 Yangfan Li<sup>a, b</sup>, Zhen Zhang<sup>a</sup>, Yi Yang<sup>a</sup>, Yi Li<sup>a, b\*</sup>

4 a Key Laboratory of Coastal and Wetland Ecosystems (Ministry of Education), Fujian Provincial Key Laboratory  
5 for Coastal Ecology and Environmental Studies, College of the Environment and Ecology, Xiamen University,  
6 Xiamen, China

7 b Southern Marine Science and Engineering Guangdong Laboratory (Zhuhai), Zhuhai, China

## 8 9 **Abstract**

10 Mangrove forests, as one of the most productive coastal ecosystems in tropical and subtropical  
11 areas, provide multiple valuable ecosystem services for human well-being. Mangrove coverage  
12 has been declining dramatically across much of developing regions due to extensive coastal  
13 anthropogenic disturbances such as reclamation, aquaculture, and seawall construction. As  
14 coastal human activities increase, there is urgent need to understand not only the direct loss, but  
15 also the vulnerability of mangroves to anthropogenic disturbances. In this study, we evaluated  
16 spatial pattern of mangrove vulnerability based on the conceptual framework of “Exposure-  
17 Sensitivity-Resilience” using geospatial datasets in mainland China. We find that within all  
18 25,829 ha mangroves in five coastal provinces of mainland China in 2015, nearly 76% of  
19 mangroves was exposed or threatened by anthropogenic disturbances. Coastal reclamation and  
20 aquaculture were the key threats causing mangrove vulnerability. The overall distribution of high,  
21 medium and low vulnerability was following similar trend of aquaculture distribution, which  
22 suggests aquaculture was the greatest anthropogenic disturbance agent to mangroves. Hotspot  
23 regions for mangrove vulnerability are located at the developing provinces such as Guangxi and

24 Hainan. This study provides the first spatially explicit evidence of the vulnerability of mangrove  
25 forests to intensive coastal anthropogenic disturbances at national scale, could serve as a  
26 benchmark for navigating coastal ecological redline management and coastal ecosystem  
27 restoration.

28 **Keywords:** mangroves; human activities; reclamation; urbanization; aquaculture; seawall

## 29 **1 Introduction**

30 Global assessments indicate that coastal tropical and subtropical areas are threatened by the  
31 greatest urbanization rates, suggesting an alarming to the conservation of coastal ecosystems in  
32 this regions and their associated ecosystem services (Branoff, 2017; Friess et al., 2016; Rocha et  
33 al., 2018; Seto et al., 2012). Mangrove provides essential ecosystem services to coastal  
34 community, including products provision, cultural services, carbon sequestration, water  
35 purification, shoreline protection/regulation and biodiversity conservation (Bell & Lovelock,  
36 2013; Crooks et al., 2018; Estoque et al., 2018; Friess & Webb, 2014). However, intensive  
37 anthropogenic disturbances caused by rapid coastal development exacerbates degradation of  
38 coastal systems. Critical functions of coastal wetland ecosystems have been eroded by global-  
39 scale anthropogenic pressures, which leads to irreversible land use and cover change, massive  
40 biodiversity loss and overloaded land-based sources of pollution (Duke et al., 2014; Wang et al.,  
41 2018).The world's area of mangrove forests has decreased by about 35% globally from 1980 to  
42 2000 and experienced a decline of 1.97 % annually from 2000 to 2012 (Hamilton & Casey, 2016;  
43 Valiela et al., 2001), about 3-5 times greater than that of terrestrial forest loss (Duke et al., 2014).  
44 Coastal reclamation and conversion of mangroves to aquaculture or agriculture creates pressure  
45 on mangrove ecosystems and has thus been a major driver of mangrove destruction (Flores-de-  
46 Santiago et al., 2017; Mukherjee et al., 2014; Spalding, 2010). Numerous studies have quantified  
47 increasing coastal reclamation and modifications over time, with demonstrated the deleterious  
48 effects of urban, agricultural, aquaculture, and infrastructure development on mangrove  
49 ecosystem (Hamilton & Friess, 2018; Rivera-Monroy et al., 2017). Global sustainability science  
50 increasingly recognize the changes of structure and function taking place in ecosystem,

51 understanding which ecological functions are vulnerable to anthropogenic disturbances is key to  
52 sustainable development (Richards & Friess, 2016).

53 Vulnerability defines the degree to which a system or system component is susceptible to  
54 experience harm due to exposure to a perturbation or stressor which mostly associated with  
55 environmental, social change, and from the absence of capacity to adapt (Adger, 2006; Turner II  
56 et al., 2003; White, 1974). Vulnerability analysis in coupled social-ecological systems draws on  
57 three major concepts: exposure, sensitivity and resilience (IPCC, 2014; Turner II et al., 2003).  
58 Through many years of studies on mangroves under climate change to reveal its distinct  
59 structures and process (Lovelock et al., 2015; Duke et al., 2014; Webb et al., 2013; Xu et al.,  
60 2016), there remains limited conceptual framework or model for the vulnerability of mangroves  
61 to anthropogenic disturbances (Branoff, 2017; Mukherjee et al., 2014; Ventura & Lana, 2014).  
62 Predictions of mangrove vulnerability around cities are mostly reported in low- and lower-  
63 middle-income regions of Africa, Latin America and India (DasGupta & Shaw, 2013; Elmqvist  
64 et al., 2013; Nortey et al., 2016).

65 Urbanization, in terms of landscape pattern changes, is particularly detrimental to degradation  
66 of mangrove in the Anthropocene. Human-induced coastal reclamation, as a typical land use  
67 change, is one of the key drivers of mangrove deforestation (Richards & Friess, 2016).  
68 Landscape changes caused by the human activities of coastal ecosystems can produce both direct  
69 and indirect effects on the long term sustainability of mangrove wetlands and coastal  
70 communities (Koh & Khim, 2014; Yim et al., 2018). These changes raise questions such as: how  
71 to identify the pattern of vulnerable mangroves to multiple environmental changes, and what are  
72 principal threats to local mangroves? This recognition requires revisions and enlargements in the  
73 basic design of vulnerability assessments, including the capacity to treat coupled social-

74 ecological systems and those linkages within and without the systems that affect their  
75 vulnerability.

76 Here, our aim was to evaluate the spatial pattern of mangrove vulnerability to coastal  
77 anthropogenic disturbances in mainland China, the regions where experienced a rapid and  
78 unprecedented process of urbanization. Our specific research questions were: (1) what is the  
79 spatial pattern of mangrove distribution across mainland China? (2) what is the spatial pattern of  
80 mangrove vulnerability to reclamation in mainland China? (3) what are the principle disturbance  
81 agents to mangroves? For addressing these three questions, we firstly mapped the mangrove  
82 extent for mainland China by using high-resolution Google Earth images and visual  
83 interpretation, and subsequently developed a methodology to evaluate the vulnerability of  
84 mangrove forests to three coastal anthropogenic disturbances (i.e., reclamation, aquaculture, and  
85 seawall).

86

## 87 **2 Study area**

88 Since half of global mangrove areas are distributed within 25 km of urban centers inhabited by  
89 dense human population (McLeod & Salm, 2006; Millennium Ecosystem Assessment, 2005),  
90 more than 90% of the world's mangroves are destroyed or threatened by diverse forms of human  
91 activities in recent decades (McLeod et al., 2011; Murray et al., 2018; Silliman et al., 2009).  
92 Alarming losses of mangrove cover have occurred in most of developing areas of China due to  
93 extensive coastal reclamation, deforestation, engineering and urbanization. Although mangroves  
94 in China cover only 0.14% of the global mangrove area, one third of mangrove species can be

95 found in this region (Romañach et al., 2018), suggesting that valuable contribution of mangrove  
96 conservation in China to biodiversity conservation in global scale.

97 Natural mangroves grow along the southeast coast from Fujian Province to Hainan Province  
98 ( $18^{\circ}12'-27^{\circ}20'N$ ). Planted mangroves are scattered within boundary of natural mangroves. To  
99 protect local mangrove ecosystems, there are 35 conservation areas and several Ramsar  
100 Convention sites in China, e.g., Dongzhaigang Mangrove Nature Reserve in Hainan Province,  
101 Fujian Zhangjiangkou National Mangrove Nature Reserve.

102 Extensive coastal reclamation occurred in rapid urbanizing metropolitans of mainland China,  
103 such as Bohai bay, Yangtze River delta and Pearl River delta, was responsible for approximately  
104 950,000 ha coastal wetlands loss and consequently ecosystem service decrease in recent years  
105 (Sajjad et al., 2018; Tian et al., 2016). According to the statistical data from the State Oceanic  
106 Administration, People's republic of China in 2015, the impacts of coastal reclamation on  
107 ecosystem services resulted in the loss in wetlands of about \$31,000 million, which accounts for  
108 6% of ocean economy in China (State Oceanic Administration, 2016).

109

### 110 **3 Materials and Methods**

#### 111 3.1 Mangrove mapping

112 For assessing the spatial vulnerability of mangroves, we firstly mapped the extent of mangrove  
113 forest in mainland China using artificial visual interpretation. Processes of mangrove  
114 interpretation included extracting mangroves with difference sources of base map (global  
115 mangrove datasets, Landsat images, etc.) and modification with filed verification in each  
116 province. Prior to interpretation, we imported the global mangrove distribution vector data in

117 2000 (<https://www.usgs.gov/>) as a base map and selected some mangrove samples in all five  
118 provinces as test examples for mangrove identification. By modifying these samples under the  
119 guidance of mangrove experts, mangroves are shown as dark green ribbon pattern and uniform  
120 texture feature along coastline (Fig. S1). To eliminate visual interference from salt marsh species  
121 (e.g., *Spartina alterniflora*), we selected Google Earth images in winter 2015 because mangroves  
122 can be more easily identified during dormant season of salt marshes (Fig. S2). Meanwhile,  
123 considering tidal inundation to mangroves, we compared the images of different time period in  
124 same areas and selected images with low tide. This procedure helped to eliminate the error in  
125 extracting submerged mangroves. Ultimately, we saved the mangrove layer in Google Earth and  
126 exported to ArcMap 10.2. After interpretation with remote sensing images, we verified  
127 mangrove area by field survey from February 2016 to March 2018 to examine interpretation  
128 accuracy of mangrove forest map. We selected 56 mangrove validation sites and identified  
129 mangrove distribution using Unmanned Aerial Vehicle (UAV) vertical photography and field  
130 survey. About 758 UAV images were used to create a confusion matrix indicating the producer's  
131 and user's accuracy. Availability of aerial photographs in our study area facilitated ground truth  
132 process in evaluating accuracy of classified mangroves.

133

## 134 3.2 Detection of anthropogenic disturbances

### 135 3.2.1 Reclamation activities

136 Reclamation is defined as the conversion of coastal land to agricultural, industrial, and urban  
137 land use (Tian et al., 2016). We assume that the impacts of reclamation activities are decreasing  
138 with distance to artificial coastline, which means the longer distance to coastline the less  
139 negative influences of reclamation activities to local mangroves. We created a buffer of coastline

140 sourced from Sajjad et al., 2018, and the buffer radius is set as 900 m since this distance covers  
141 98% of mangroves in mainland China. Then we conduct a stress-gradient analysis in three levels  
142 of pressure based on 300 m intervals (Fig. 1, adapted from Sutton-Grier et al., 2015). The coastal  
143 area within the first 300 m buffer zone adjacent to reclamation suggests the highest level of  
144 pressure from reclamation activities on mangroves, which was assigned with a high-pressure  
145 value.

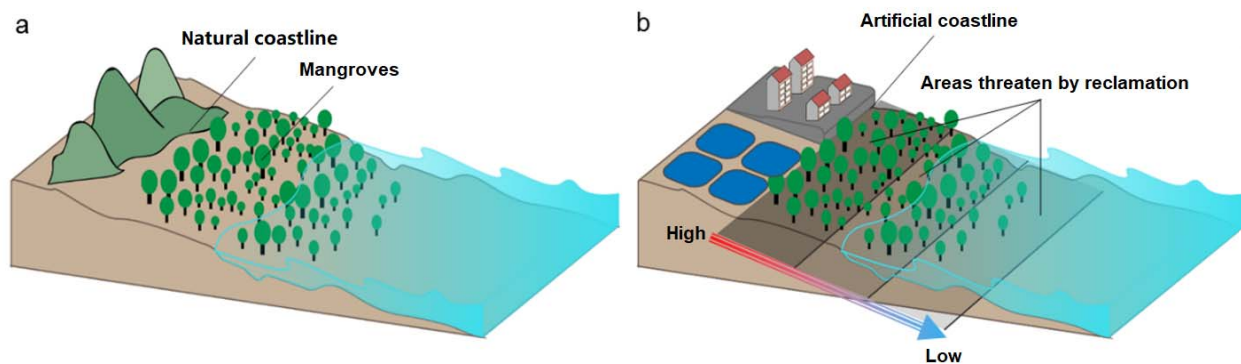

146

147 **Fig. 1.** A schematic diagram of the spatial distribution of the reclamation pressure.

148

### 149 3.2.2 Aquaculture pollution

150 Aquaculture pollution dataset contains two layers-aquaculture ponds and tidal creek, which are  
151 the main sources of pollutants in local ecosystem. Muddy sediments and wastewater of  
152 aquaculture ponds produce highly concentrated pollutants that lead to degradation of mangrove  
153 system (Xin et al., 2014). Aquaculture ponds data was extracted from the layer of coastline in  
154 our previous study (Sajjad et al., 2018), tidal creek was detected by visual image interpretation  
155 based on Google Earth. We created buffer zones for both layers with distance of 70 m, 140 m  
156 and 210 m separately to model stress-gradient analysis regarding aquaculture pollution (Fig. 2,



157 adapted from Sutton-Grier et al., 2015). High threats from aquaculture pollution was assigned in  
158 the coastal area of 70 m buffer zone, while relative low threats within the 210 m buffer zone.

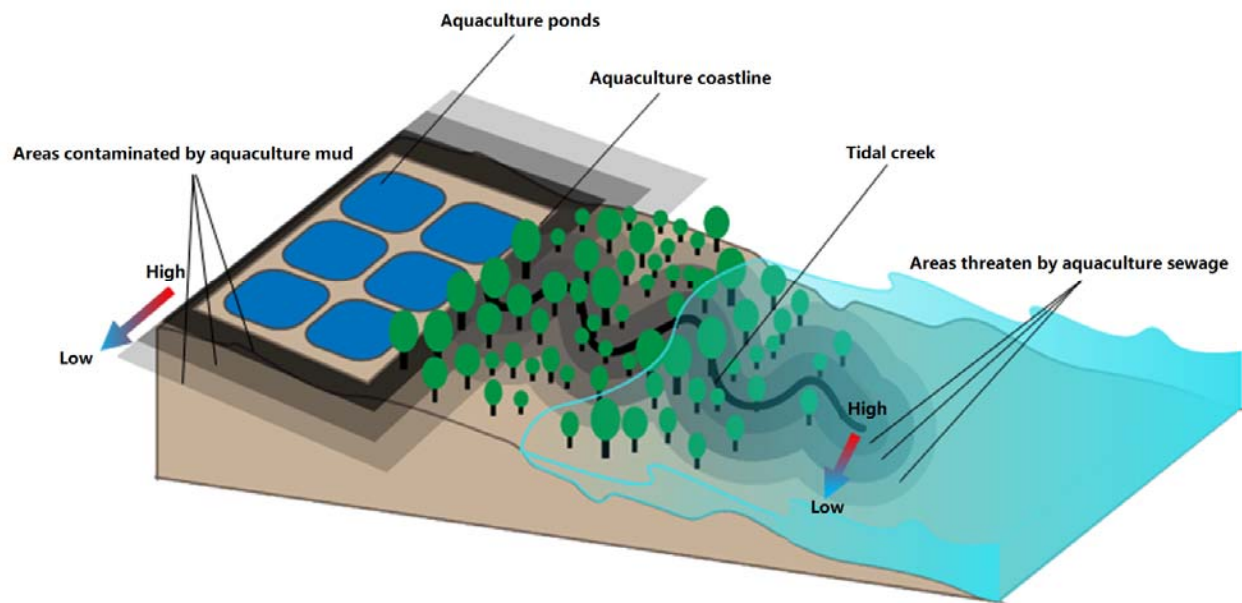

159

160 **Fig. 2.** A schematic diagram of the spatial distribution of the aquaculture pollution pressure.

161

### 162 3.2.3 Seawall

163 With the increase of dam construction and large reservoir projects in developing countries  
164 (Moran et al., 2018; Shi et al., 2018), large area of landscape transformed from natural coastline  
165 to seawall. The newly built impervious surface areas squeeze coastal zone toward ocean with  
166 increasing risk of flood (Doody, 2013; Ramesh et al., 2015). Three buffer zones were created  
167 along the claimed coastline with the distances of 300 m, 600 m and 900 m to create stress-  
168 gradient layer of flood risk (Fig. 3, adapted from Sutton-Grier et al., 2015). In this case, 300 m  
169 buffer zone is the area with the lowest flood threat, which is opposite to the threat distribution of  
170 reclamation threat.

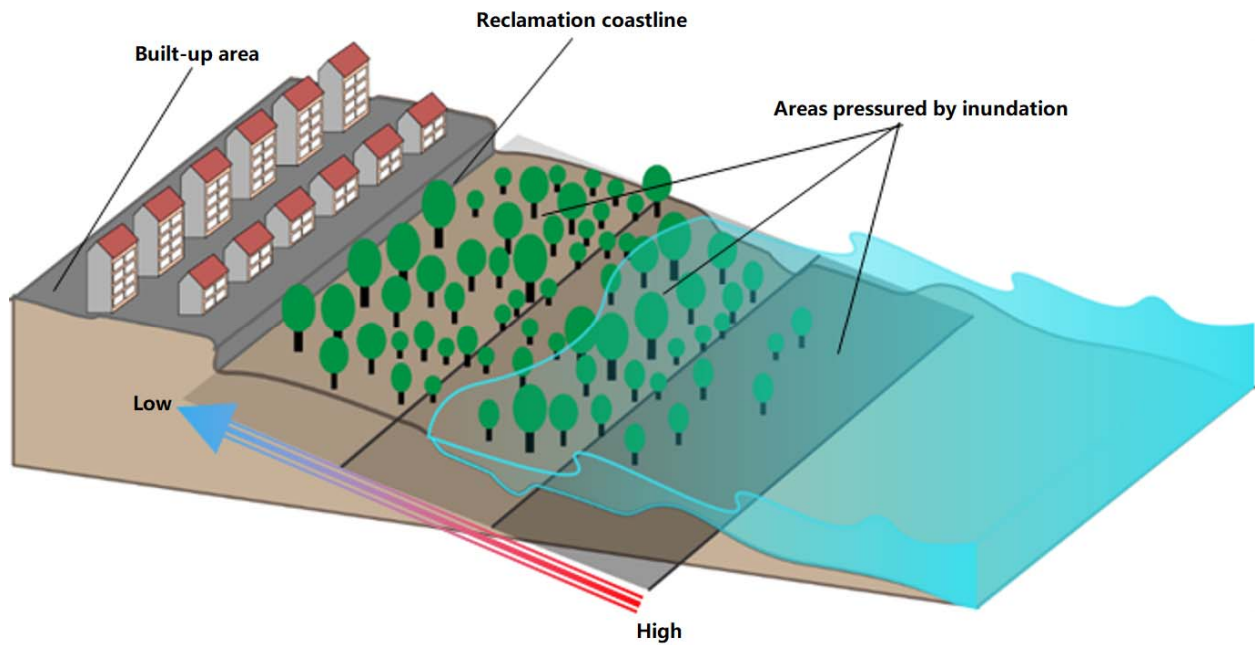

171

172 **Fig. 3.** A schematic diagram of the spatial distribution of the seawall barrier pressure.

173

### 174 3.3 Vulnerability assessment

175 Referring to the vulnerability framework proposed by Turner II et al. (2003), we proposed a  
176 spatial assessment framework to evaluate mangrove vulnerability using InVEST model, which is  
177 a spatially-explicit modelling tool for assessing ecosystem services and would return a suite of  
178 results in a raster format to evaluate ecosystem states. (Sharp et al., 2015). We used the Habitat  
179 Risk Assessment submodule from InVEST model with inputs of all anthropogenic disturbance  
180 agents to local mangroves. Vulnerability of mangroves was characterized by integrating three  
181 subsystems: exposure, sensitivity and resilience (Fig. 4; Table S1).

182 Exposure index represents the amount and intensity of anthropogenic stressors to mangroves.

183 Exposure value was divided by the overlapped area of mangroves and reclamation and

184 reclamation pressure intensity. Sensitivity index indicates negative impacts of reclamation on  
185 mangroves, and was quantified by mangrove loss area and mangrove species change. Resilience  
186 characterizes the ability of mangroves to maintain their structural and functional stability in the  
187 process of and after reclamation disturbances. And it was quantified by mangrove species  
188 number, ratio of non-endangered species, regional ecological management, and potential  
189 restoration areas for mangroves. We then clustered these indexes to corresponding vulnerability  
190 ranking of low (value=1), moderate (value=2) and high (value=3) using *K*-means algorithm (See  
191 Supplementary material for more details).

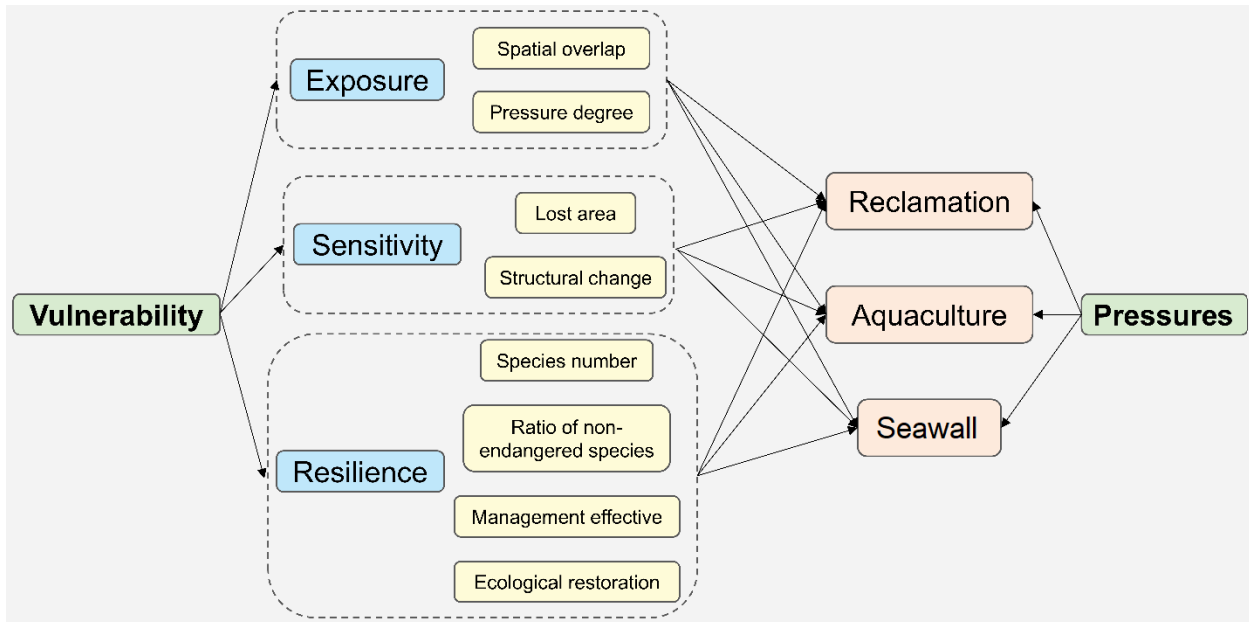

192

193 **Fig. 4.** Indexes of mangrove vulnerability to anthropogenic disturbance pressures.

194

195 Exposure indicators represent risks of mangrove while experiencing vast reclamation activities,  
196 which describes characteristics and components of exposure to reclamation. Inputs of exposure  
197 included polygons of mangroves and reclamation with attributes about mangrove distribution

198 and 12 types of reclamation pressure. Sensitivity is a dose-response of mangrove system to  
199 reclamation, it is an interaction between reclamation and mangrove conditions. Sensitivity, as an  
200 interlinked factor between the other two aspects, was calculated with potential loss and potential  
201 structure change of mangroves to different reclamation pressures. Resilience refers to recovery  
202 capacities of mangrove system to reclamation activities, resilience was represented by both two  
203 internal indicators (species numbers and ratio of non-threaten species) and external resilience  
204 indicator (ecological management).

205 Vulnerability of mangroves can be characterized by degree to which mangrove is likely to  
206 experience damage during coastal development. Vulnerability of mangroves is predicated on  
207 trade-offs between economic development and coastal ecosystem services maintenance, as they  
208 are affected by interconnections operating at different spatiotemporal and functional scales.  
209 Based on vulnerability framework, the Habitat Risk Assessment model in InVEST was used to  
210 calculate spatial vulnerability of mangroves in each province while adapting to coastal  
211 reclamation (Sharp et al., 2015). Combination of vulnerability framework and InVEST model  
212 produces spatial qualitative estimate of potential risks in terms of vulnerability value while  
213 exposed to reclamation, which differentiates areas with relatively high or low exposure to  
214 reclamation threats.

215

## 216 **4 Results**

### 217 4.1 General distribution of mangroves

218 In total, 25,829 ha mangroves were identified in five coastal provinces of mainland China in  
219 2015 (Fig. 5), 96.14% of which were distributed in southern part of coastal provinces (Hainan,

220 Guangxi and Guangdong Province), mainly located in the Beibu Gulf Economic Rim (the  
221 economic region surrounding around China's southwestern coastal area). About 11,115 ha (43%)  
222 mangroves was classified in Guangdong Province, where many coastal areas are dominated by  
223 sedimentary environments. Followed by Guangxi Province with a number of 9,297 ha  
224 mangroves, the third largest area of mangroves was 4,420 ha in Hainan Province. About 963 ha  
225 and 34 ha mangroves were detected in Fujian Province and Zhejiang Province respectively.

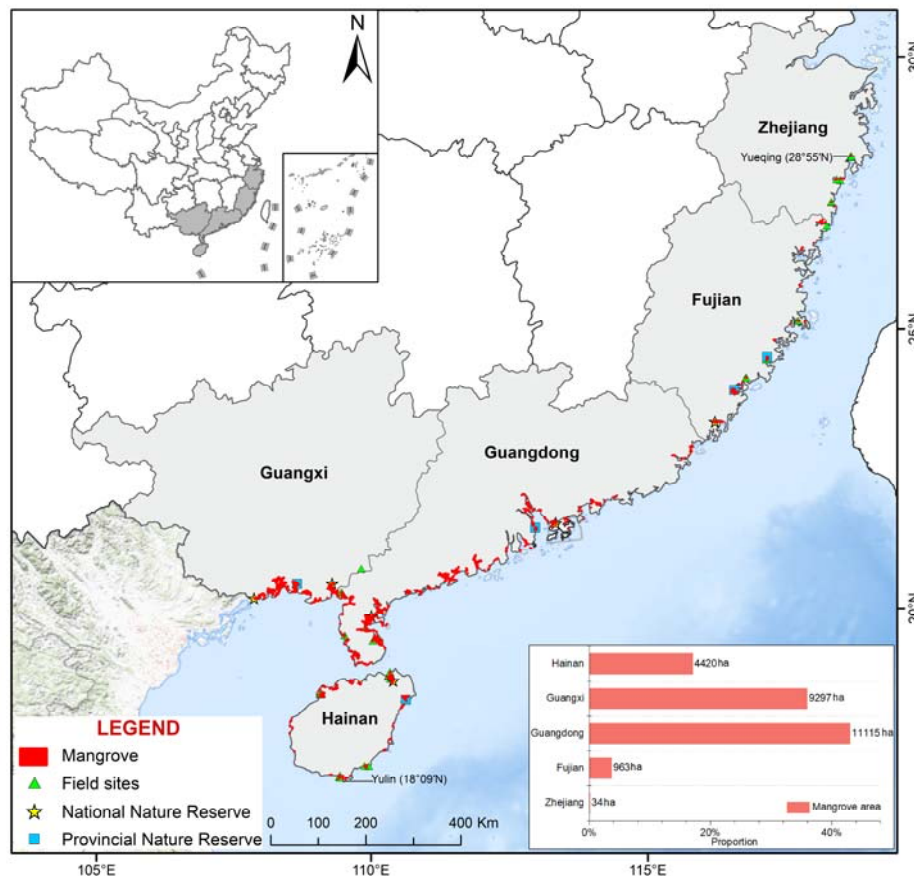

226  
227

**Fig. 5.** Mangroves distribution in five coastal provinces.

#### 228 4.2 Principal disturbance agents to mangroves

229 Landscape conversion from natural coastline to artificial coastline was the key driver of  
230 mangrove degradation. By overlapping coastline and mangroves, we found that only 7% of  
231 mangrove was adjacent to natural coastline types (Fig. 6). Most of mangroves were exposed to

232 anthropogenic disturbances caused by redeveloped coastlines, where 64% of mangrove was  
233 located near aquaculture ponds and 29% of mangrove was threatened by filled land. It suggests  
234 that 93% of mangrove was squeezed by human-built bank and dam toward ocean, and they were  
235 threatened by floods on the marine side.

236 In a local scale, reclamation activities in Zhejiang Province resulted in the highest density of  
237 filled coastline among all coastal provinces. Followed by Guangxi Province, high percentage  
238 (98%) of artificial coastline was adjacent to mangrove, due to large areas of aquaculture feeding  
239 ponds. In all these five provinces, the highest ratio (30%) of natural coastline adjacent to  
240 mangroves appeared in Fujian Province. Even though the coverage of aquaculture in Fujian,  
241 Guangdong and Hainan Province were lower than that in Guangxi, but aquaculture land in all  
242 provinces covered more than that of natural land. Guangdong was the province which has the  
243 longest coastline both artificial and nature, followed by Guangxi, demonstrating that these two  
244 provinces need to be given priority (Fig. 6b).

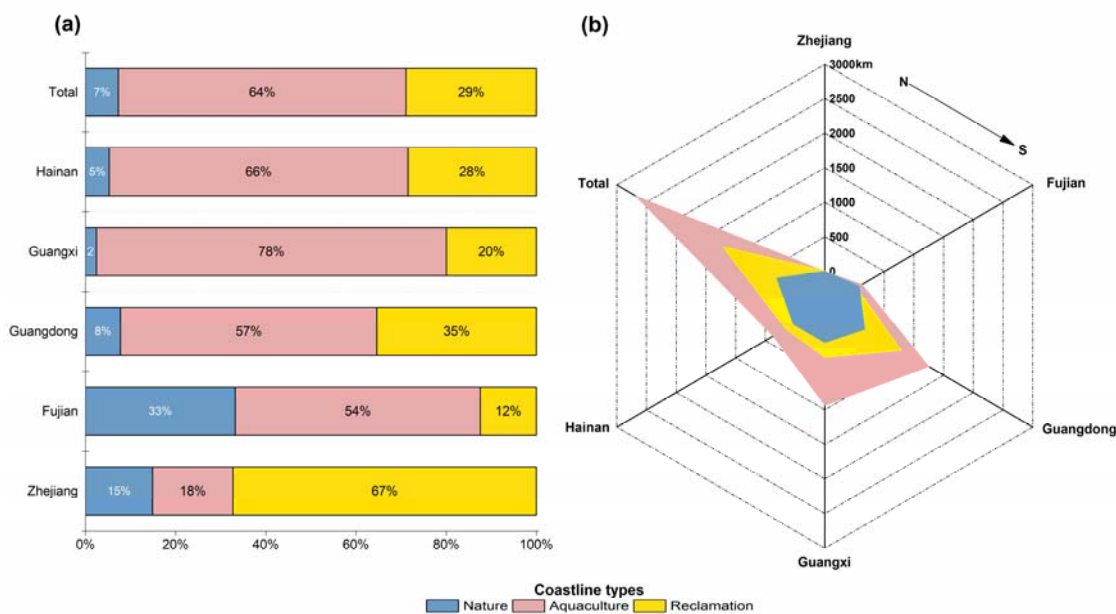

245

246

**Fig. 6.** Proportions (a) and lengths (b) of different coastline types in 2015.

247

#### 248 4.3 Spatial distribution of mangrove vulnerability

249 In this study, spatial distribution of vulnerability in mangroves was derived by combining  
250 vulnerability framework and Habitat Risk Assessment (HAR) model in InVEST (Fig. 7). We  
251 found that 29% of mangrove areas was identified under high vulnerability, only 24% of them  
252 was estimated as area with low vulnerability. The average value of vulnerability in all five  
253 provinces were ranked from high to low as Zhejiang, Hainan, Guangxi, Guangdong, and Fujian.  
254 As can be seen from Fig. 8, all mangroves in Zhejiang Province were under high vulnerability,  
255 which indicates high risk of degradation in this region. Mangroves in Zhejiang Province were  
256 planted species, due to its climate conditions and high coverage of artificial coastline, there is  
257 limited suitable natural coastal areas for mangroves. About 64.41% of mangroves in Hainan  
258 Province were observed under high vulnerability, only 9.44% of them were remained in low  
259 human influences. The main reason of such high vulnerability in this region was caused by  
260 aquaculture pollution and high ratio of endangered species. Nearly 25% of mangroves in both  
261 Guangxi and Fujian Province was classified with high vulnerability, it was because of marine  
262 aquaculture and coastal redevelopment, all of which have led to significant degradation and  
263 ecological disturbances to mangroves.



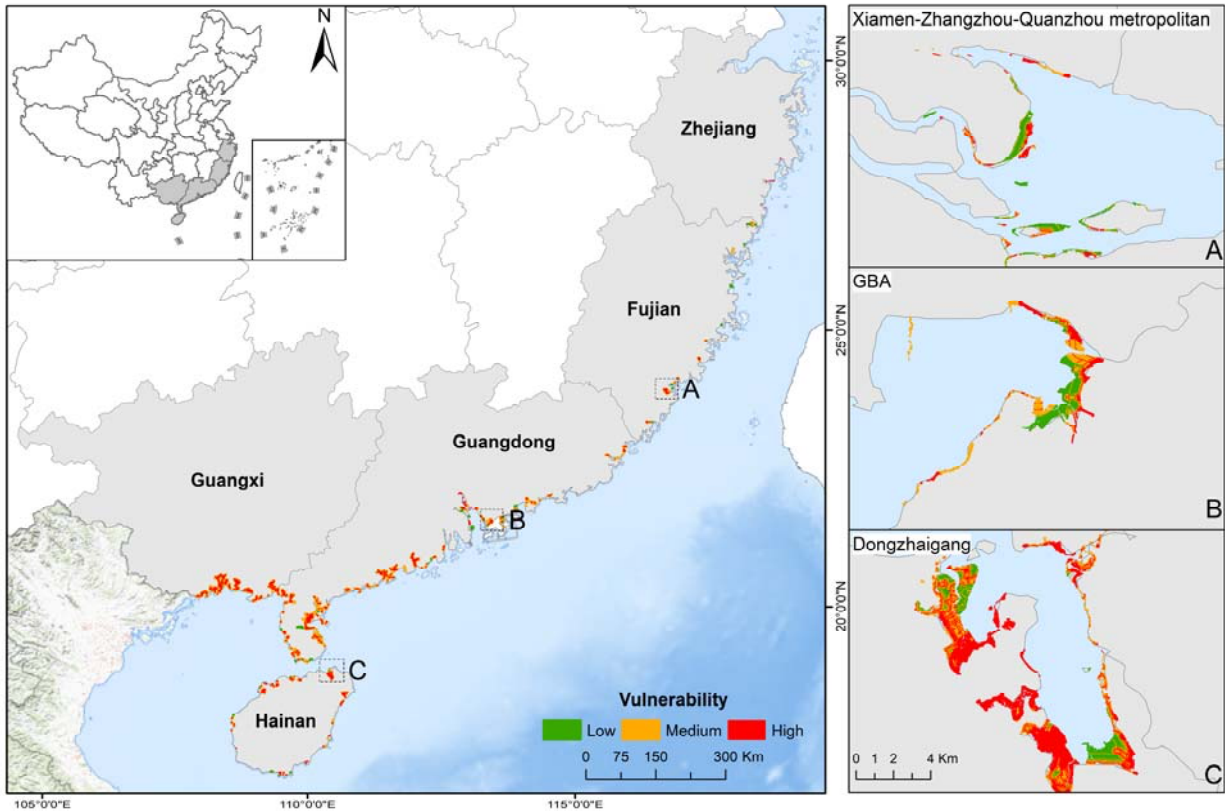

264

265 **Fig. 7.** Distribution of mangrove vulnerability to anthropogenic disturbances along China's  
266 coastal area. (GBA: Guangdong-Hongkong-Macao Greater Bay Area).

267

268 Among all these selected vulnerability indicators, aquaculture and reclamation coastlines were  
269 the key drivers of mangroves degradation. Areas with high vulnerability in Guangxi and Hainan  
270 Province was found near large areas of aquaculture and reclamation. The overall distribution of  
271 high, medium and low vulnerability was following similar trend (Fig. 8), the largest groups of  
272 vulnerability (peak values) appeared in Guangxi, Guangdong and Hainan Province. However,  
273 peak values of three levels of vulnerability were slightly different, while that of medium and low  
274 vulnerability were in Guangxi Province, and mangroves in Hainan had the largest area of high



275 vulnerability. In general, based on the distribution of coastline and vulnerability, we found that  
276 aquaculture was primarily threats to high risk of mangroves degradation in these five provinces.

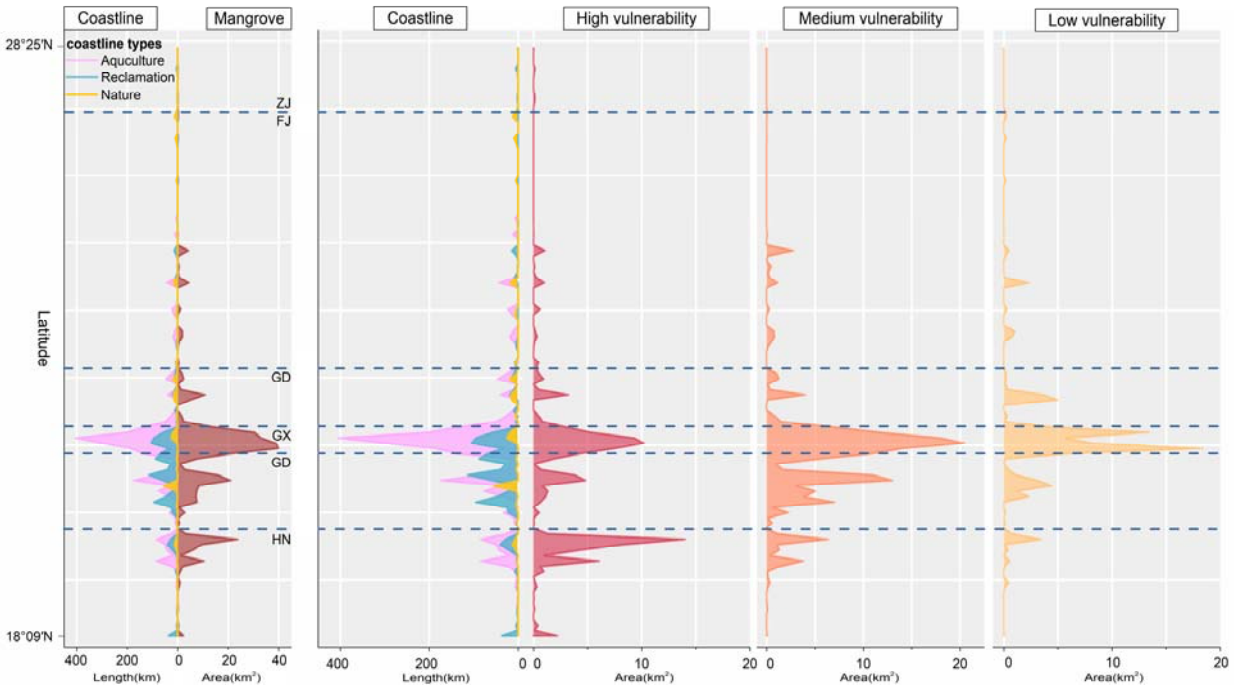

278 **Fig. 8.** Spatial distribution of coastline with mangrove and different level of vulnerability. The  
279 left side of Y axis shows the latitude of different types of coastline (aquaculture, reclamation,  
280 and natural) from Zhejiang Province to Hainan Province (ZJ: Zhejiang Province; FJ: Fujian  
281 Province; GD: Guangdong Province; GX: Guangxi Province; HN: Hainan Province), the right  
282 side of Y axis represents area of mangroves and different level of vulnerability spatially. The left  
283 X axis is the length of mangroves and right X axis is the area of different level of vulnerability.

284

285 In a local scale, mangroves in urban agglomerations experienced higher vulnerability than that  
286 rest of mangrove (Fig. 7). As the Guangdong-Hong Kong-Macao Greater Bay Area (GBA)  
287 becomes an important economic zone in China, rapid urbanization in coastal areas lead to high  
288 level of disturbance caused by human activities, which is the principal threat to local mangrove

289 ecosystem. In the meantime, Guangdong Province has the largest area of mangrove in all five  
290 provinces, which includes 7 natural protected areas for mangrove conservation. These protected  
291 areas help to maintain key functions of local mangrove ecosystems under coastal reclamation.  
292 The northern boundary of natural mangroves is located in Fujian Province, the Xiamen-  
293 Zhangzhou-Quanzhou metropolitan in this Province was also exposed to relative high  
294 vulnerability due to extensive reclamation activities. Even if protected in a national nature  
295 reserve, mangroves in Dongzhaigang also faced serious threats due to the substantially increased  
296 aquaculture ponds and construction area.

#### 297 4.4 Accuracy assessment

298 Our results show that the map of mangrove forests in 2015 showed a high user's accuracy of  
299 97.4% and producer's accuracy of 82.2%. We also compared our results with similar research in  
300 China to quantify the reliability of our interpretation (Jia et al., 2018). Detected total area of  
301 mangroves (25,829 ha) in our research was comparable with their results derived from Landsat  
302 archive (22,419 ha). Due to the coarse resolution of Landsat archive (30 m), small mangrove  
303 fragments in urban agglomeration identified in our study was not able to be classified by using  
304 Landsat images. Therefore, the identified area of mangrove in our study is larger than their result.  
305 The main difference between these two datasets was in the Pearl River Estuary and Xiamen-  
306 Zhangzhou-Quanzhou metropolitan. In order to improve our accuracy of mangrove identification  
307 in those regions, field investigation was carried out in summer time. Overall, the validation  
308 results suggest that our mangrove map is mainly consistent with ground truth and similar  
309 research in China.

310

## 311 **5 Discussion**

### 312 5.1 Impacts of principal threats on vulnerability distribution to local ecosystems

313 Due to continuous influences of coastal reclamation and aquaculture farming, mangroves are  
314 exposed to dynamic and extensive threats in local region. Conversion of mangroves to  
315 aquaculture ponds was encouraged by local governments, which becomes main income of  
316 coastal regions. Among all types of coastal development activity in terms of land use change, the  
317 most significant replacement of land use was aquaculture (64% of total area), which leads to high  
318 vulnerability of local mangroves.

319 As comparing all three levels of vulnerability distribution, we found that mangroves with  
320 medium level of vulnerability was the most sensitive area to aquaculture factor. The overall  
321 distribution pattern of medium vulnerability was coordinated with that of aquaculture. Except in  
322 Zhejiang Province, aquaculture was the domain land use type in local mangrove areas, which  
323 threatened more than half of mangroves in our study area. Threat of aquaculture in driving  
324 mangrove deforestation is not only a problem in China, but also was found in southeast Asia  
325 countries, such as Thailand, Indonesia, Vietnam, and the Philippines (Primavera, 2000; Richards  
326 & Friess, 2016).

327 Land redevelopment and infrastructure construction was another direct factor leading to  
328 mangrove loss. Even it influences on vulnerability was not that significant as aquaculture, it  
329 shows high correlations with high level of vulnerability, especially in the areas dominated by  
330 reclamation coastlines in Hainan and Fujian Province. In those areas adjacent to long artificial  
331 coastline, it also addresses high level of influence on vulnerability. Extensive and large area of  
332 land reclamation occurred in Pearl River Delta (Guangdong Province) and Beibu Gulf (Guangxi  
333 Province), these regions were shown with high vulnerability of mangrove degradation. Coastal

334 artificial infrastructures, such as large industrial complexes, coastal interstate highways, and  
335 airports, occupied areas suitable for mangrove growth, and accounted for 29% of total mangrove  
336 areas in mainland China. Local government historically aimed to increase terrestrial land through  
337 expansion towards ocean, especially in the most developed metropolises, such as GBA, Bohai  
338 Bay (Tianjin Province), Hangzhou Bay (Zhejiang Province) and Min River estuary (Fujian  
339 Province). High intensity of human disturbances toward ocean poses potential stress to mangrove  
340 ecosystem, which reduce the buffer zone of mangroves in adapting to sea level rise.

#### 341 5.2 Threats to local ecosystem services: habitats and biodiversity

342 Mangroves degradation and loss is not only bounded with mangrove ecosystem itself,  
343 furthermore, spillover effects of mangroves degradation have significant influences on  
344 ecosystem processes and services that they provide. Vulnerability of habitats and biodiversity  
345 increased as structure and functionality of local ecosystems were challenged by anthropogenic  
346 disturbances. Within areas of high vulnerability in mangroves, the most challenges to local  
347 ecosystems were habitats degradation and biodiversity loss (Arkema et al., 2014). Nearly 35 ha  
348 of mangrove disappeared in Futian mangrove conservation area because of city construction,  
349 which leads to 39% of bird density loss and 45% of species reduction (Wang & Wang, 2007).  
350 Species extinctions can be followed by loss in functional diversity, particularly in mangroves  
351 with high vulnerability. Further degradation in mangroves is likely to be followed by accelerated  
352 functional losses. New top-down policies adopted by China's central government in 2016 has  
353 imposed a conception of 'Redline', a boundary delineating a coastal strip in which to preserve  
354 existing natural habitats, both for maintaining ecosystem function and to reduce conflicts  
355 between natural processes (exacerbated by accelerated sea-level rise) and human settlements and  
356 infrastructure. The Central Leading Group for Comprehensively Deepening Reforms of China

357 approved a series of decisions of Redline policy in 2016. It comprises “Opinions on Delimiting  
358 and Guarding Ecological Protection Redline”, “Program for Wetland Protection and Restoration”,  
359 and “Rules on Coastal Line Protection and Utilization”, which all emphasize the integration of  
360 “One Redline Map” in China’s coastal area. China’s coastal Redline would be challenged by  
361 2020 in maintaining 35% (6,300 km) of coastal line, which is the goal set by the central  
362 government in protecting coastal line (Larson, 2015). Consequently, transitioning the coastline  
363 from natural to artificial, through such methods as land claim or armoring, makes coastal areas  
364 more vulnerable in terms of lost biodiversity and increased natural hazards (Arkema et al., 2015;  
365 Steffen et al., 2015). Mangroves, as a typical coastal ecosystem included in the Redline area,  
366 maintain key functions of local ecosystems, they also contribute to biodiversity conservation.

367 In 2018, China’s governments announced to halt all coastal land reclamation that related to  
368 business land use. But degradation of mangroves and irreversible landscape changes are still  
369 challenging in maintain key functions of coastal ecosystems. As mangrove habitats are smaller or  
370 fragmented, their essential ecosystem services may be lost within and beyond its boundary. The  
371 central government should act quickly to nominate and protect vulnerable coastal sites, because  
372 this would be consistent with the national Redline program and reclamation restoration. The  
373 local governments of coastal provinces and cities should also proactively adopt effective  
374 measures of their own, consistent with the national Redline policies, to protect vulnerable coastal  
375 ecosystem.

### 376 5.3 Limitations

377 There are some uncertainties in this study. The 900-m-buffer of coastal line and the 300 m  
378 interval in the buffer zone were chosen based on general distribution of mangroves in our study  
379 area, which may different while implying to other regions. Moreover, in the current analysis, all

380 8 indicators in vulnerability assessment were treated with equal weight, which was set according  
381 to current states of coastal region in China. This may various due to spatial heterogeneity in  
382 different area, and need to adjust while applying to other cases.

383 Spatial outputs of mangrove vulnerability in this research provide a qualitative representation  
384 of the relative contributions of anthropogenic disturbances to coastal vulnerability and highlight  
385 the potential threats of reclamation in degrading mangrove ecosystems. Further information on  
386 social, economic and coastal disaster are helpful in giving a comprehensive assessment of  
387 mangroves ecosystem and better informing development strategies and permitting in setting  
388 conservation priorities, monitoring deforestation and forest degradation.

389

## 390 **6 Conclusion**

391 Mangroves are under threats from different types of anthropogenic disturbances, coastal rapid  
392 development, in terms of aquaculture and reclamation, has been a principal driver of mangrove  
393 loss and degradation in China, and it becomes a growing concern worldwide. These two factors  
394 were the main drivers of medium and high level of vulnerability. The continuously altered,  
395 destroyed or transformed mangroves with high vulnerability is an early warning signal of  
396 dramatic functionality loss of such major coastal ecosystem, which initiates more research of  
397 mangrove in coastal urban environments.

398 Mangrove areas of high vulnerability suggest relative high level of combinate anthropogenic  
399 disturbances from conversion for alternative uses (aquaculture, urban construction), which can  
400 be prioritized for the development of conservation strategies. Distribution of mangrove  
401 vulnerability also located the hotspots of key functionality loss and the vulnerable urban areas

402 with high risk of storm surges or climate-related disasters. As we estimated, the major  
403 disturbance agent to mangroves was aquaculture ponds, especially in Guangxi and Hainan  
404 Provinces. These findings indicate an urgent need for implementing adaptive strategies to serve  
405 mangroves from anthropogenic disturbances, and provides a spatially-explicit assessment for  
406 navigating mangrove conservation.

407

#### 408 **Acknowledgements**

409 We would like to appreciate Professor Wenqing Wang at Xiamen University who provided  
410 valuable comments and suggestions. We also thank Dr. Diego Rybski in Potsdam Institute for  
411 Climate Impact Research for his insightful comments and suggestions. Financial supports were  
412 provided by the Programs of Science and Technology on Basic Resources Survey for the  
413 Ministry of Science and Technology of China (No. 2017FY100701), the National Natural  
414 Science Foundation of China (NSFC) Grants (No. 41976208 and 41701205), and the  
415 Fundamental Research Funds for the Central Universities of China (No. 20720190089).

416

417 **References**

- 418 Adger, W. N. (2006). Vulnerability. *Global Environmental Change*, 16(3), 268–281.  
419 <https://doi.org/10.1016/j.gloenvcha.2006.02.006>
- 420 Arkema, K. K., Verutes, G., Bernhardt, J. R., Clarke, C., Rosado, S., Canto, M., et al. (2014).  
421 Assessing habitat risk from human activities to inform coastal and marine spatial  
422 planning: a demonstration in Belize. *Environmental Research Letters*, 9(11), 114016.  
423 <https://doi.org/10.1088/1748-9326/9/11/114016>
- 424 Arkema, K. K., Verutes, G. M., Wood, S. A., Clarke-Samuels, C., Rosado, S., Canto, M., et al.  
425 (2015). Embedding ecosystem services in coastal planning leads to better outcomes for  
426 people and nature. *Proceedings of the National Academy of Sciences*, 112(24), 7390–  
427 7395. <https://doi.org/10.1073/pnas.1406483112>
- 428 Bell, J., & Lovelock, C. E. (2013). Insuring Mangrove Forests for Their Role in Mitigating  
429 Coastal Erosion and Storm-Surge: An Australian Case Study. *Wetlands*, 33(2), 279–289.  
430 <https://doi.org/10.1007/s13157-013-0382-4>
- 431 Branoff, B. L. (2017). Quantifying the influence of urban land use on mangrove biology and  
432 ecology: A meta-analysis. *Global Ecology and Biogeography*, 26(11), 1339–1356.  
433 <https://doi.org/10.1111/geb.12638>
- 434 Crooks, S., Sutton-Grier, A. E., Troxler, T. G., Herold, N., Bernal, B., Schile-Beers, L., & Wirth,  
435 T. (2018). Coastal wetland management as a contribution to the US National Greenhouse  
436 Gas Inventory. *Nature Climate Change*, 8(12), 1109–1112.  
437 <https://doi.org/10.1038/s41558-018-0345-0>



- 438 DasGupta, R., & Shaw, R. (2013). Changing perspectives of mangrove management in India-An  
439 analytical overview. *Ocean & Coastal Management*, 80, 107–118.  
440 <https://doi.org/10.1016/j.ocecoaman.2013.04.010>
- 441 Doody, J. P. (2013). Coastal squeeze and managed realignment in southeast England, does it tell  
442 us anything about the future? *Ocean & Coastal Management*, 79(Supplement C), 34–41.  
443 <https://doi.org/10.1016/j.ocecoaman.2012.05.008>
- 444 Duke, N., Nagelkerken, I., Agardy, T., Wells, S., & Van Lavieren, H. (2014). The importance of  
445 mangroves to people: A call to action. United Nations Environment Programme World  
446 Conservation Monitoring Centre (UNEP-WCMC), Cambridge.
- 447 Elmqvist, T., Fragkias, M., Goodness, J., Güneralp, B., Marcotullio, P. J., McDonald, R. I., et al.  
448 (2013). *Urbanization, Biodiversity and Ecosystem Services: Challenges and*  
449 *Opportunities*. Dordrecht: Springer Netherlands. [https://doi.org/10.1007/978-94-007-](https://doi.org/10.1007/978-94-007-7088-1)  
450 [7088-1](https://doi.org/10.1007/978-94-007-7088-1)
- 451 Estoque, R. C., Myint, S. W., Wang, C., Ishtiaque, A., Aung, T. T., Emerton, L., et al. (2018).  
452 Assessing environmental impacts and change in Myanmar’s mangrove ecosystem service  
453 value due to deforestation (2000-2014). *Global Change Biology*, 24(11), 5391–5410.  
454 <https://doi.org/10.1111/gcb.14409>
- 455 Flores-de-Santiago, F., Serrano, D., Flores-Verdugo, F., & Monroy-Torres, M. (2017).  
456 Application of a simple and effective method for mangrove afforestation in semiarid  
457 regions combining nonlinear models and constructed platforms. *Ecological Engineering*,  
458 103, 244–255. <https://doi.org/10.1016/j.ecoleng.2017.04.008>

- 459 Friess, D. A., & Webb, E. L. (2014). Variability in mangrove change estimates and implications  
460 for the assessment of ecosystem service provision. *Global Ecology and Biogeography*, 23.  
461 <https://doi.org/10.1111/geb.12140>
- 462 Friess, D. A., Thompson, B. S., Brown, B., Amir, A. A., Cameron, C., Koldewey, H. J., et al.  
463 (2016). Policy challenges and approaches for the conservation of mangrove forests in  
464 Southeast Asia: Conservation of Mangrove Forests. *Conservation Biology*, 30(5), 933–  
465 949. <https://doi.org/10.1111/cobi.12784>
- 466 Hamilton, S. E., & Casey, D. (2016). Creation of a high spatio-temporal resolution global  
467 database of continuous mangrove forest cover for the 21st century (CGMFC-21):  
468 CGMFC-21. *Global Ecology and Biogeography*, 25(6), 729–738.  
469 <https://doi.org/10.1111/geb.12449>
- 470 Hamilton, S. E., & Friess, D. A. (2018). Global carbon stocks and potential emissions due to  
471 mangrove deforestation from 2000 to 2012. *Nature Climate Change*, 8(3), 240–244.  
472 <https://doi.org/10.1038/s41558-018-0090-4>
- 473 Intergovernmental Panel on Climate Change (IPCC). (2014). *IPCC Fifth Assessment Report*  
474 *(AR5): Climate Change 2014: Impacts, Adaptation, and Vulnerability. Part A: Global and*  
475 *Sectoral Aspects. Contribution of Working Group II to the Fifth Assessment Report of the*  
476 *Intergovernmental Panel on Climate Change.* (p. 169). Cambridge University Press,  
477 Cambridge, UK.
- 478 Jia, M., Wang, Z., Zhang, Y., Mao, D., & Wang, C. (2018). Monitoring loss and recovery of  
479 mangrove forests during 42 years: The achievements of mangrove conservation in China.

- 480 *International Journal of Applied Earth Observation and Geoinformation*, 73, 535–545.  
481 <https://doi.org/10.1016/j.jag.2018.07.025>
- 482 Koh, C., & Khim, J. S. (2014). The Korean tidal flat of the Yellow Sea: Physical setting,  
483 ecosystem and management. *Ocean & Coastal Management*, 102, 398–414.  
484 <https://doi.org/10.1016/j.ocecoaman.2014.07.008>
- 485 Larson, C. (2015). Migratory bird populations in Asia are crashing as Yellow Sea habitat  
486 dwindles. *Science*, 350(6257), 150–152.
- 487 Lovelock, C. E., Cahoon, D. R., Friess, D. A., Guntenspergen, G. R., Krauss, K. W., Reef, R., et  
488 al. (2015). The vulnerability of Indo-Pacific mangrove forests to sea-level rise. *Nature*,  
489 526(7574), 559–563. <https://doi.org/10.1038/nature15538>
- 490 McLeod, E., & Salm, R. V. (2006). *Managing mangroves for resilience to climate change*. The  
491 World Conservation Union (IUCN), Gland, Switzerland.
- 492 McLeod, E., Chmura, G. L., Bouillon, S., Salm, R., Björk, M., Duarte, C. M., et al. (2011). A  
493 blueprint for blue carbon: toward an improved understanding of the role of vegetated  
494 coastal habitats in sequestering CO<sub>2</sub>. *Frontiers in Ecology and the Environment*, 9(10),  
495 552–560. <https://doi.org/10.1890/110004>
- 496 Millennium Ecosystem Assessment. (2005). *Ecosystems and human well-being: synthesis*.  
497 Washington, DC: Island Press.
- 498 Moran, E. F., Lopez, M. C., Moore, N., Müller, N., & Hyndman, D. W. (2018). Sustainable  
499 hydropower in the 21st century. *Proceedings of the National Academy of Sciences*,  
500 115(47), 11891–11898. <https://doi.org/10.1073/pnas.1809426115>

- 501 Mukherjee, N., Sutherland, W. J., Khan, M. N. I., Berger, U., Schmitz, N., Dahdouh-Guebas, F.,  
502 & Koedam, N. (2014). Using expert knowledge and modeling to define mangrove  
503 composition, functioning, and threats and estimate time frame for recovery. *Ecology and*  
504 *Evolution*. <https://doi.org/10.1002/ece3.1085>
- 505 Murray, N. J., Phinn, S. R., DeWitt, M., Ferrari, R., Johnston, R., Lyons, M. B., et al. (2018).  
506 The global distribution and trajectory of tidal flats. *Nature*.  
507 <https://doi.org/10.1038/s41586-018-0805-8>
- 508 Nandy, S., & Kushwaha, S. P. S. (2011). Study on the utility of IRS 1D LISS-III data and the  
509 classification techniques for mapping of Sunderban mangroves. *Journal of Coastal*  
510 *Conservation*, 15(1), 123–137. <https://doi.org/10.1007/s11852-010-0126-z>
- 511 Nortey, D. D. N., Aheto, D. W., Blay., Jonah, F. E., & Asare, N. K. (2016). Comparative  
512 Assessment of Mangrove Biomass and Fish Assemblages in an Urban and Rural  
513 Mangrove Wetlands in Ghana. *Wetlands*, 36(4), 717–730.  
514 <https://doi.org/10.1007/s13157-016-0783-2>
- 515 Primavera, J. H. (2000). Development and conservation of Philippine mangroves: institutional  
516 issues. *Ecological Economics*, 35(1), 91–106. [https://doi.org/10.1016/S0921-](https://doi.org/10.1016/S0921-8009(00)00170-1)  
517 [8009\(00\)00170-1](https://doi.org/10.1016/S0921-8009(00)00170-1)
- 518 Ramesh, R., Chen, Z., Cummins, V., Day, J., D’Elia, C., Dennison, B., et al. (2015). Land-Ocean  
519 Interactions in the Coastal Zone: Past, present & future. *Anthropocene*, 12, 85–98.  
520 <https://doi.org/10.1016/j.ancene.2016.01.005>

- 521 Richards, D. R., & Friess, D. A. (2016). Rates and drivers of mangrove deforestation in  
522 Southeast Asia, 2000-2012. *Proceedings of the National Academy of Sciences*, *113*(2),  
523 344–349. <https://doi.org/10.1073/pnas.1510272113>
- 524 Rivera-Monroy, V., Lee, S. Y., Kristensen, E., & Twilley, R. (2017). *Mangrove ecosystems: a*  
525 *global biogeographic perspective*. New York, NY: Springer International Publishing.
- 526 Rocha, J. C., Peterson, G., Bodin, Ö., & Levin, S. (2018). Cascading regime shifts within and  
527 across scales, 31.
- 528 Romañach, S. S., DeAngelis, D. L., Koh, H. L., Li, Y., Teh, S. Y., Raja Barizan, R. S., & Zhai, L.  
529 (2018). Conservation and restoration of mangroves: Global status, perspectives, and  
530 prognosis. *Ocean & Coastal Management*, *154*, 72–82.  
531 <https://doi.org/10.1016/j.ocecoaman.2018.01.009>
- 532 Sajjad, M., Li, Y., Tang, Z., Cao, L., & Liu, X. (2018). Assessing Hazard Vulnerability, Habitat  
533 Conservation, and Restoration for the Enhancement of Mainland China’s Coastal  
534 Resilience. *Earth’s Future*, *6*(3), 326–338. <https://doi.org/10.1002/2017EF000676>
- 535 Seto, K. C., Güneralp, B., & Hutyra, L. R. (2012). Global forecasts of urban expansion to 2030  
536 and direct impacts on biodiversity and carbon pools. *Proceedings of the National*  
537 *Academy of Sciences*, *109*(40), 16083–16088. <https://doi.org/10.1073/pnas.1211658109>
- 538 Sharp, R., Tallis, H. T., Ricketts, T., Guerry, A. D., Wood, S. A., Chaplin-Kramer, R., et al.  
539 (2015). InVEST +VERSION+ User’s Guide. The Natural Capital Project, Stanford  
540 University, University of Minnesota, The Nature Conservancy, and World Wildlife Fund.  
541 Retrieved from [http://data.naturalcapitalproject.org/nightly-](http://data.naturalcapitalproject.org/nightly-build/release_default/release_default/documentation/)  
542 [build/release\\_default/release\\_default/documentation/](http://data.naturalcapitalproject.org/nightly-build/release_default/release_default/documentation/)

- 543 Shi, H., Chen, J., Liu, S., & Sivakumar, B. (2019). The role of large dams in promoting  
544 economic development under the pressure of population growth. *Sustainability*, *11*(10), 2965.  
545 <https://doi.org/10.3390/su11102965>
- 546 Silliman, B. R., Bertness, M. D., & Grosholz, E. D. (2009). *Human Impacts on Salt Marshes: A*  
547 *Global Perspective* (First edition). Berkeley: University of California Press.
- 548 Spalding, M. (2010). *World Atlas of Mangroves*. London, UK: EarthScan.
- 549 State Oceanic Administration, People's republic of China. (2016). *Report on the management of*  
550 *the use of sea areas (2015)*. State Oceanic Administration, People's republic of China,  
551 Beijing, China. Retrieved from  
552 [http://www.soa.gov.cn/zwgk/hygb/hysyglgb/201604/t20160429\\_51327.html](http://www.soa.gov.cn/zwgk/hygb/hysyglgb/201604/t20160429_51327.html)
- 553 Steffen, W., Richardson, K., Rockström, J., Cornell, S. E., Fetzer, I., Bennett, E. M., et al. (2015).  
554 Planetary boundaries: Guiding human development on a changing planet. *Science*,  
555 *347*(6223). <https://doi.org/10.1126/science.1259855>
- 556 Sutton-Grier A E., Wowk K., Bamford H. (2015). Future of our coasts: The potential for natural  
557 and hybrid infrastructure to enhance the resilience of our coastal communities, economies  
558 and ecosystems [J]. *Environmental Science and Policy*, *51*, 137-148.  
559 <https://doi.org/10.1016/j.envsci.2015.04.006>
- 560 Tian, B., Wu, W., Yang, Z., & Zhou, Y. (2016). Drivers, trends, and potential impacts of long-  
561 term coastal reclamation in China from 1985 to 2010. *Estuarine, Coastal and Shelf*  
562 *Science*, *170*, 83–90. <https://doi.org/10.1016/j.ecss.2016.01.006>

- 563 Turner II, B. L., Kasperson, R. E., Matson, P. A., McCarthy, J. J., Corell, R. W., Christensen, L.,  
564 et al. (2003). A framework for vulnerability analysis in sustainability science.  
565 *Proceedings of the National Academy of Sciences*, 100(14), 8074–8079.  
566 <https://doi.org/10.1073/pnas.1231335100>
- 567 Valiela, I., Bowen, J. L., & York, J. K. (2001). Mangrove Forests: One of the World's  
568 Threatened Major Tropical Environments. *BioScience*, 51(10), 807.  
569 [https://doi.org/10.1641/0006-3568\(2001\)051\[0807:MFOOTW\]2.0.CO;2](https://doi.org/10.1641/0006-3568(2001)051[0807:MFOOTW]2.0.CO;2)
- 570 Ventura, A. de O. B., & Lana, P. da C. (2014). A new empirical index for assessing the  
571 vulnerability of peri-urban mangroves. *Journal of Environmental Management*, 145,  
572 289–298. <https://doi.org/10.1016/j.jenvman.2014.04.036>
- 573 Wang, Q., Li, Y., & Li, Y. (2018). Realizing a new resilience paradigm on the basis of land-  
574 water-biodiversity nexus in a coastal city. *Ocean & Coastal Management*.  
575 <https://doi.org/10.1016/j.ocecoaman.2018.09.004>
- 576 Wang, W., & Wang, M. (2007). *Mangroves in China (in Chinese)*. China Science Press.
- 577 Webb, E. L., Friess, D. A., Krauss, K. W., Cahoon, D. R., Guntenspergen, G. R., & Phelps, J.  
578 (2013). A global standard for monitoring coastal wetland vulnerability to accelerated sea-  
579 level rise. *Nature Climate Change*, 3(5), 458–465. <https://doi.org/10.1038/nclimate1756>
- 580 White, G. F. (1974). *Natural hazards: Local, national, global*. Oxford University Press , New  
581 York.

- 582 Xin, K., Huang, X., Hu, J., Li, C., Yang, X., & Arndt, S. K. (2014). Land use Change Impacts on  
583 Heavy Metal Sedimentation in Mangrove Wetlands—A Case Study in Dongzhai Harbor  
584 of Hainan, China. *Wetlands*, 34(1), 1–8. <https://doi.org/10.1007/s13157-013-0472-3>
- 585 Xu, Y., Shen, Z.-H., Ying, L.-X., Ciais, P., Liu, H.-Y., Piao, S., et al. (2016). The exposure,  
586 sensitivity and vulnerability of natural vegetation in China to climate thermal variability  
587 (1901–2013): An indicator-based approach. *Ecological Indicators*, 63, 258–272.  
588 <https://doi.org/10.1016/j.ecolind.2015.12.023>
- 589 Yim, J., Kwon, B.-O., Nam, J., Hwang, J. H., Choi, K., & Khim, J. S. (2018). Analysis of forty  
590 years long changes in coastal land use and land cover of the Yellow Sea: The gains or  
591 losses in ecosystem services. *Environmental Pollution*, 241, 74–84.  
592 <https://doi.org/10.1016/j.envpol.2018.05.058>
